# Supplementary material
Source: publisher site journal article supplement (https://www.dovepress.com/article/605392)
Supplement: Supplementary file 1 [file Supplementary%20Material.docx]

**Table S1.** Genetic variants used as exposure for MR analysis.

| Exposure | SNPs | Chr | Pos | Gene | Consequence | Relevance to trait | EA | OA | β | SE | EAF | *P* | F |
| --- | --- | --- | --- | --- | --- | --- | --- | --- | --- | --- | --- | --- | --- |
| FI | rs10891490 | 11 | 113014805 | NCAM1 | Intron Variant | Not established; NCAM1 encodes CD56, involved in NK cell-mediated immune surveillance. Indirect relevance to placental immunity and PE pathogenesis is possible but not directly confirmed. | C | T | -0.0188 | 0.0034 | 0.5915 | 2.00E-08 | 30.574 |
| rs12739243 | 1 | 210128698 | SYT14 | Intron Variant | Not established | C | T | -0.0242 | 0.004 | 0.2206 | 1.28E-09 | 36.602 |
| rs1363103 | 5 | 104582136 | - | - | - | C | T | -0.0191 | 0.0034 | 0.38 | 2.23E-08 | 31.558 |
| rs17612102 | 15 | 51971897 | MAPK6, LEO1 | 5 Prime UTR Variant, 2KB Upstream Variant | Not established; MAPK6: MAP kinase family member. MAPK pathway is involved in inflammation and endothelial function, which are relevant to both frailty and PE, but no direct genetic link confirmed. | C | T | 0.0187 | 0.0034 | 0.5933 | 2.85E-08 | 30.250 |
| rs2013208 | 3 | 50091966 | RBM5 | Intron Variant | Not established | T | C | -0.0187 | 0.0033 | 0.4776 | 1.47E-08 | 32.111 |
| rs2396766 | 7 | 114678016 | FOXP2 | Intron Variant | Not established | A | G | 0.0201 | 0.0033 | 0.4725 | 1.22E-09 | 37.099 |
| rs3959554 | 15 | 41151726 | - | - | - | G | A | 0.0189 | 0.0034 | 0.4177 | 1.74E-08 | 30.900 |
| rs4146140 | 10 | 60125604 | ANK3 | Intron Variant | Not established | T | C | -0.0198 | 0.0034 | 0.3811 | 6.83E-09 | 33.913 |
| rs4952693 | 2 | 43924669 | LRPPRC | Intron Variant | Not established; encodes a mitochondrial protein involved in organelle function and cytoskeletal organization. Mitochondrial dysfunction is a shared feature of frailty and PE, but no direct genetic link to either condition has been confirmed. | T | C | -0.0194 | 0.0034 | 0.3734 | 1.47E-08 | 32.557 |
| rs56299474 | 8 | 22135291 | - | - | - | A | C | 0.0241 | 0.0044 | 0.1733 | 3.94E-08 | 30.000 |
| rs583514 | 3 | 173396377 | NLGN1 | Intron Variant | Not established | C | T | 0.0199 | 0.0033 | 0.5111 | 1.65E-09 | 36.364 |
| rs8089807 | 18 | 41742675 | - | - | - | T | C | -0.0248 | 0.0043 | 0.1866 | 6.50E-09 | 33.263 |
| rs82334 | 4 | 3223644 | HTT | Intron Variant | Not established; encodes huntingtin, implicated in Huntington's disease. Functional decline in Huntington’s disease shares features with frailty, but no direct genetic link between HTT and the frailty index or preeclampsia has been established. | C | A | -0.0223 | 0.0035 | 0.3177 | 3.13E-10 | 40.595 |
| rs9275160 | 6 | 32684843 | - | - | - | A | G | 0.0382 | 0.0035 | 0.3397 | 7.18E-28 | 119.121 |
| PE (ebi-a-GCST90018906) | rs10112094 | 8 | 143156116 | - | - | - | T | G | 0.4436 | 0.0968 | 0.028949 | 4.59E-06 | 21.007 |
| rs10192639 | 2 | 204782531 | PARD3B | Intron Variant | Not established | A | G | -0.4568 | 0.091 | 0.944702 | 5.19E-07 | 25.203 |
| rs13125101 | 4 | 80253438 | LOC124900725 | Intron Variant | - | A | G | 0.1462 | 0.0306 | 0.313468 | 1.78E-06 | 22.824 |
| rs137895377 | 1 | 150163275 | LINC02988 | Intron Variant | - | G | T | 0.4561 | 0.0887 | 0.03263 | 2.74E-07 | 26.433 |
| rs1649221 | 7 | 34948146 | DPY19L1;  LOC102724723 | Intron Variant | Not established | A | G | -0.1453 | 0.0316 | 0.269564 | 4.20E-06 | 21.140 |
| rs1858787 | 2 | 61734976 | - | - | - | G | A | 0.215 | 0.0462 | 0.609934 | 3.35E-06 | 21.648 |
| rs2420953 | 10 | 121724364 | - | - | - | C | T | 0.1889 | 0.0359 | 0.176961 | 1.37E-07 | 27.687 |
| rs7174985 | 15 | 73982607 | STOML1 | 3 Prime UTR Variant | Not established | G | T | 0.1441 | 0.0296 | 0.342872 | 1.13E-06 | 23.706 |
| rs77674430 | 1 | 224329362 | NVL | Intron Variant | Not established | A | G | 0.2107 | 0.0437 | 0.132015 | 1.44E-06 | 23.252 |
| rs7772738 | 6 | 120060483 | - | - | - | A | G | -0.185 | 0.0404 | 0.473025 | 4.79E-06 | 20.980 |
| rs9948846 | 18 | 37486851 | CELF4 | Intron Variant | Not established | G | A | -0.1355 | 0.0287 | 0.548838 | 2.35E-06 | 22.290 |
| PE (finn-b-O15_PREECLAMPS) | rs10247965 | 7 | 42621225 | - | - | - | C | T | 0.080517 | 0.015791 | 0.366002 | 3.41E-07 | 26 |
| rs1075618 | 3 | 112079070 | TMPRSS7 | Intron Variant | Not established | A | G | -0.07316 | 0.015637 | 0.622226 | 2.88E-06 | 21.893 |
| rs11065961 | 12 | 111585263 | ATXN2 | Intron Variant | Not established; encodes ataxin-2, involved in endocytosis, mTOR signaling, and mitochondrial function. GWAS studies have linked ATXN2 to obesity and hypertension, which are risk factors for both frailty and preeclampsia, but no direct causal link to either condition has been confirmed. | A | G | 0.096813 | 0.018697 | 0.778821 | 2.24E-07 | 26.812 |
| rs11169943 | 12 | 51879464 | - | - | - | T | C | 0.108164 | 0.022931 | 0.118841 | 2.39E-06 | 22.249 |
| rs113414093 | 2 | 218994449 | CRYBA2 | 2KB Upstream Variant | Not established | A | G | 0.123206 | 0.026562 | 0.085111 | 3.51E-06 | 21.516 |
| rs116420012 | 2 | 54955481 | EML6 | Intron Variant | Not established | T | C | -0.36182 | 0.074103 | 0.013195 | 1.05E-06 | 23.84 |
| rs116724739 | 2 | 186804365 | - | - | - | G | T | 0.176824 | 0.03815 | 0.0375 | 3.57E-06 | 21.483 |
| rs12466669 | 2 | 67739118 | - | - | - | T | C | -0.07435 | 0.015448 | 0.428722 | 1.49E-06 | 23.164 |
| rs12496329 | 3 | 169434875 | MECOM | Intron Variant | Not established | T | C | -0.07545 | 0.015251 | 0.508677 | 7.54E-07 | 24.472 |
| rs12509595 | 4 | 80261400 | - | - | - | C | T | 0.120725 | 0.016246 | 0.311684 | 1.08E-13 | 55.222 |
| rs12656497 | 5 | 32831833 | - | - | - | C | T | 0.07477 | 0.015505 | 0.585233 | 1.42E-06 | 23.255 |
| rs12716917 | 16 | 81591905 | CMIP | Intron Variant | Not established | A | C | 0.073777 | 0.01554 | 0.579672 | 2.06E-06 | 22.538 |
| rs13306561 | 1 | 11805747 | MTHFR, CLCN6 | Intron Variant, 2KB Upstream Variant | MTHFR: Possible relevance; encodes methylenetetrahydrofolate reductase (MTHFR), involved in homocysteine metabolism. MTHFR polymorphisms and hyperhomocysteinemia have been investigated as potential risk factors for preeclampsia. Elevated homocysteine is also associated with cardiovascular disease and functional decline in aging, which overlap with frailty. | G | A | -0.13774 | 0.022254 | 0.145845 | 6.03E-10 | 38.311 |
| rs148462858 | 18 | 62430639 | - | - | - | C | A | 0.189671 | 0.040188 | 0.033788 | 2.36E-06 | 22.274 |
| rs167479 | 19 | 11416089 | RGL3 | Missense Variant | Not established | G | T | 0.107998 | 0.015467 | 0.575396 | 2.90E-12 | 48.754 |
| rs1874490 | 19 | 31343072 | TSHZ3-AS1, TSHZ3 | Non Coding Transcript Variant, Intron Variant | Not established | C | T | 0.100467 | 0.021172 | 0.145985 | 2.08E-06 | 22.517 |
| rs187501810 | 19 | 18234844 | PDE4C | Intron Variant | Not established | T | G | 0.191612 | 0.039792 | 0.036209 | 1.47E-06 | 23.188 |
| rs2071384 | 15 | 90887387 | FES | Intron Variant | Not established | A | G | -0.07607 | 0.01558 | 0.409705 | 1.05E-06 | 23.84 |
| rs2782981 | 10 | 114021788 | LOC105378492 | Intron Variant | - | C | T | 0.074054 | 0.016102 | 0.653409 | 4.24E-06 | 21.152 |
| rs2831717 | 21 | 28348686 | - | - | - | T | C | 0.110378 | 0.02256 | 0.122642 | 9.95E-07 | 23.938 |
| rs34131225 | 9 | 89538784 | - | - | - | A | G | 0.086249 | 0.018617 | 0.203484 | 3.61E-06 | 21.463 |
| rs34467368 | 4 | 37283357 | NWD2 | Intron Variant | Not established | A | G | -0.08351 | 0.018248 | 0.234115 | 4.73E-06 | 20.944 |
| rs4660218 | 1 | 42132202 | - | - | - | G | A | -0.089 | 0.018869 | 0.212579 | 2.40E-06 | 22.247 |
| rs4682658 | 3 | 134286671 | - | - | - | G | A | 0.077758 | 0.016753 | 0.695853 | 3.46E-06 | 21.543 |
| rs4769613 | 13 | 28564472 | - | - | - | T | C | -0.08197 | 0.015255 | 0.530481 | 7.73E-08 | 28.874 |
| rs4895929 | 6 | 132137279 | LINC01013 | Intron Variant | - | T | C | -0.07322 | 0.016027 | 0.35245 | 4.91E-06 | 20.873 |
| rs6026742 | 20 | 59165550 | ZNF831 | Intron Variant | Not established | A | G | 0.122886 | 0.019778 | 0.169052 | 5.19E-10 | 38.604 |
| rs6740322 | 2 | 43334790 | THADA | Intron Variant | Not established | C | A | 0.087481 | 0.019066 | 0.190182 | 4.47E-06 | 21.053 |
| rs74899993 | 3 | 156607849 | - | - | - | A | G | -0.14105 | 0.027602 | 0.090391 | 3.22E-07 | 26.114 |
| rs77234803 | 12 | 69430401 | YEATS4 | Intron Variant | Not established | G | A | -0.09469 | 0.019439 | 0.199996 | 1.11E-06 | 23.728 |
| rs7839988 | 8 | 30333170 | - | - | - | T | C | 0.138889 | 0.025083 | 0.095145 | 3.07E-08 | 30.659 |
| rs7899293 | 10 | 33620651 | - | - | - | C | T | 0.094563 | 0.020428 | 0.158411 | 3.67E-06 | 21.428 |
| rs79046494 | 16 | 28516005 | - | - | - | A | G | 0.081123 | 0.015366 | 0.412866 | 1.30E-07 | 27.873 |
| rs818164 | 2 | 10474337 | - | - | - | G | A | 0.084826 | 0.017873 | 0.749989 | 2.07E-06 | 22.525 |
| rs915665 | 6 | 30813604 | LINC00243, LOC124905395 | Non Coding Transcript Variant, Intron Variant | - | A | G | 0.140146 | 0.023616 | 0.110467 | 2.95E-09 | 35.217 |
| rs9479893 | 6 | 154602257 | - | - | - | G | A | -0.07906 | 0.016881 | 0.293848 | 2.82E-06 | 21.936 |

Abbreviations: Chr, Chromosome; Pos, Position (GRCh38); EA, effect allele; OA, other allele; β, allele effect value; SE, standard error of β; EAF, effect allele frequency.
